# Supplementary figures and images for: Correction function for biased results due to matrix effects in residue analysis of beta-agonists in porcine tissues and urine with LC-MS/MS
Source: Royal Society of Chemistry journal article supplement (doi:10.1039/c5ra28050h), 2016-01-01

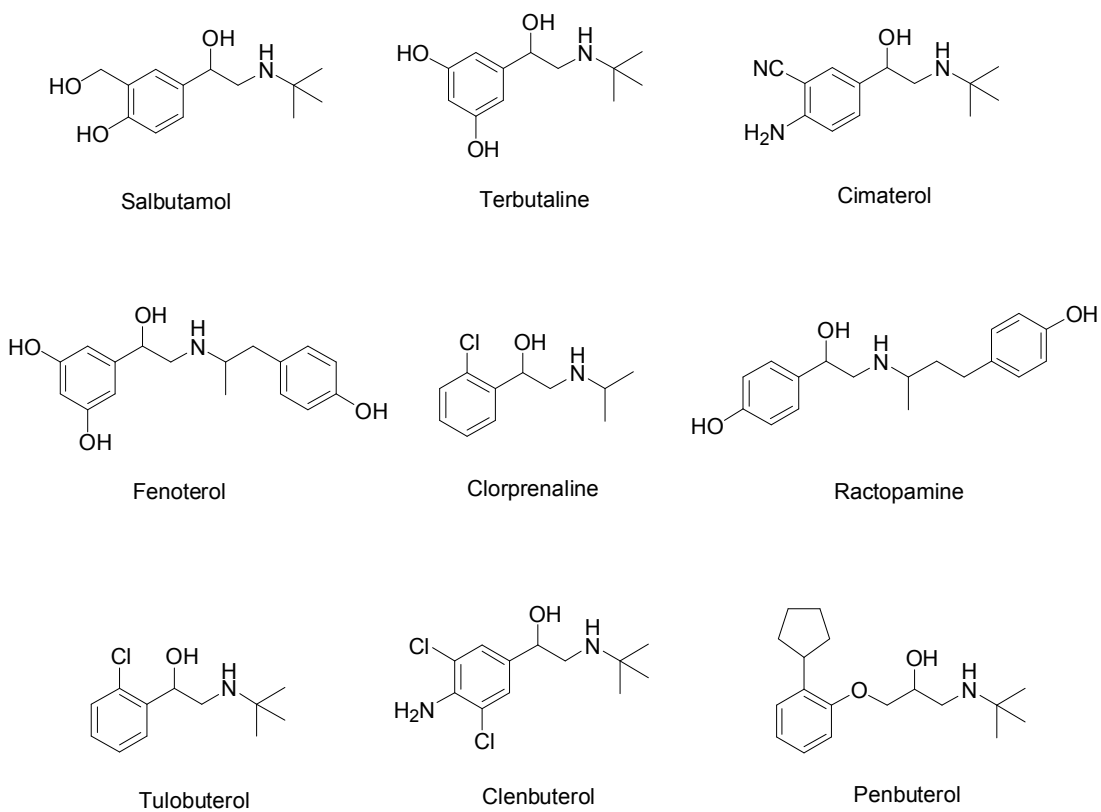

**Fig. 1S** Chemical structures of nine  $\beta$ -agonists

Supplement: c5ra28050h1.pdf [file c5ra28050h1.pdf]
